# Supplementary material for: Genomic Insight into Pediococcus acidilactici HN9, a Potential Probiotic Strain Isolated from the Traditional Thai-Style Fermented Beef Nhang
Source: MDPI journal article supplement (doi:10.3390/microorganisms9010050), 2020-12-27
Supplement: s1 [file s1]

**Table S1 The information of strain used in this study.**

| Strains           | Assembly Accession | Status   | Size (Mb) | Assembly Coverage | Submitter Organization                                                     |
|-------------------|--------------------|----------|-----------|-------------------|----------------------------------------------------------------------------|
| HN9* (This study) | CP061715-CP061717  | Complete | 2.14      | 500               | Prince of Songkla University                                               |
| ZPA017            | GCF_001767275.1    | Complete | 2.13      | N/A               | Beijing Academy of Agriculture and Forestry Sciences                       |
| BCC1              | GCF_001922325.1    | Complete | 2.17      | 415               | China Agricultural University                                              |
| SRCM100424        | GCF_002173575.1    | Complete | 2.09      | 628               | Microbial Institute for Fermentation Industry                              |
| SRCM100313        | GCF_002173595.1    | Complete | 2.11      | 607               | Microbial Institute for Fermentation Industry                              |
| SRCM101189        | GCF_002174215.1    | Complete | 2.09      | 1338              | Microbial Institute for Fermentation Industry                              |
| PB22              | GCF_003957355.1    | Complete | 1.95      | 416               | Korea Food Research Institute                                              |
| SRCM103387        | GCF_004101585.1    | Complete | 2.03      | 310.93            | Microbial Institute for Fermentation Industry                              |
| SRCM103367        | GCF_004102605.1    | Complete | 1.96      | 234.7             | Microbial Institute for Fermentation Industry                              |
| SRCM103444        | GCF_004103635.1    | Complete | 19.70     | 346.26            | Microbial Institute for Fermentation Industry                              |
| ATCC 8042         | GCF_004355265.1    | Complete | 2.01      | 531               | Seoul National University                                                  |
| JQII-5            | GCF_006770685.1    | Complete | 2.08      | 200               | BGI                                                                        |
| SRCM102731        | GCF_009913875.1    | Complete | 2.06      | 355               | Microbial Institute for Fermentation Industry                              |
| SRCM102732        | GCF_009913895.1    | Complete | 2.07      | 447               | Microbial Institute for Fermentation Industry                              |
| CACC 537          | GCF_010092385.1    | Complete | 2.03      | 12                | Center for Industrialization of Agricultural and Livestock Microorganisms  |
| PMC48             | GCF_011604585.1    | Complete | 2.04      | 209.81            | Probiotics Microbiome Convergence Center                                   |
| PMC65             | GCF_013127755.1    | Complete | 2.04      | 482.33            | Probiotics Microbiome Convergence Center                                   |
| DSM 20284         | GCF_000146325.1    | Scaffold | 1.94      | 130               | Baylor College of Medicine                                                 |
| 7_4               | GCF_000163095.1    | Scaffold | 2.01      | N/A               | Broad Institute                                                            |
| D3                | GCF_000380265.1    | Scaffold | 1.96      | 567               | Texas A&M University                                                       |
| DSM 19927         | GCF_001437115.1    | Scaffold | 2.04      | 100               | Shanghai Majorbio                                                          |
| LPBC161           | GCF_004022295.1    | Scaffold | 1.97      | 11                | UFPR                                                                       |
| L8-A              | GCF_004099675.1    | Scaffold | 1.94      | 142               | Texas Tech University                                                      |
| L3-A              | GCF_004099705.1    | Scaffold | 1.94      | 140               | Texas Tech University                                                      |
| L2-A              | GCF_004099815.1    | Scaffold | 1.94      | 214               | Texas Tech University                                                      |
| L14-B             | GCF_004100005.1    | Scaffold | 1.93      | 67                | Texas Tech University                                                      |
| IRZ12B            | GCF_013375165.1    | Scaffold | 2.05      | 258               | Padova university                                                          |
| MGYG-HGUT-01296   | GCF_902373655.1    | Scaffold | 1.94      | 10                | EMG                                                                        |
| SRCM100320        | GCF_001672605.1    | Contig   | 2.07      | 758               | Microbial Institute for Fermentation Industry                              |
| NRCC4             | GCF_001867265.1    | Contig   | 1.45      | 12                | ICAR-National Research Centre on Camel                                     |
| JKY18             | GCF_001868705.1    | Contig   | 1.87      | 788               | Anhui University                                                           |
| UMNPBX20          | GCF_002553675.1    | Contig   | 2.03      | 50                | University of Minnesota                                                    |
| GS1               | GCF_003571945.1    | Contig   | 2.00      | 120               | Kangwon National University                                                |
| WT                | GCF_003591195.1    | Contig   | 2.02      | 160               | Kangwon National University                                                |
| SRCM103289        | GCF_004054355.1    | Contig   | 2.09      | 393.98            | Chunlab                                                                    |
| FAM 18969         | GCF_005864375.1    | Contig   | 2.07      | 60                | Agroscope                                                                  |
| NBRC 12231        | GCF_006539025.1    | Contig   | 1.93      | 298               | National Institute of Technology and Evaluation Biological Resource Center |
| E1                | GCF_009910835.1    | Contig   | 2.01      | 20                | University of Surrey                                                       |
| M16               | GCF_011009585.1    | Contig   | 1.82      | 5                 | University of Surrey                                                       |
| I32               | GCF_011009675.1    | Contig   | 2.03      | 15                | University of Surrey                                                       |
| E24               | GCF_011009695.1    | Contig   | 2.01      | 15                | University of Surrey                                                       |
| F7                | GCF_011009715.1    | Contig   | 2.09      | 15                | University of Surrey                                                       |
| CCUG 32235        | GCF_012396515.1    | Contig   | 1.93      | 162.8             | Bacterial Special Pathogens Branch (CDC)                                   |
| BIO6314           | GCF_013249135.1    | Contig   | 1.92      | 876               | Bioprox                                                                    |
| S7                | GCF_900163535.1    | Contig   | 2.01      | 448               | MICALIS                                                                    |

Table S2 Metadata of all strains used in this study.

| AssemblyAccession | AssemblyName | Taxid  | Organism                                        | SpeciesTaxid | SpeciesName              | AssemblyStatus  | BioprojectAccession | BioprojectID | BioprojectAccession2 | BioprojectID3 | BioSampleAccession | BioSampleID | Sub_type | Sub_value | Coverage | SubmitterOrganization                                                                                     | RefSeq_category       | string4                    | Genbank         | RefSeq          | Similarity | ContigN50 | ScaffoldN50 |
|-------------------|--------------|--------|-------------------------------------------------|--------------|--------------------------|-----------------|---------------------|--------------|----------------------|---------------|--------------------|-------------|----------|-----------|----------|-----------------------------------------------------------------------------------------------------------|-----------------------|----------------------------|-----------------|-----------------|------------|-----------|-------------|
| GCF_002982135.1   | ASM298213v1  | 114090 | Pediococcus inopinatus (firmicutes)             | 114090       | Pediococcus inopinatus   | Complete Genome | PRJNA376812         | 376812       | PRJNA224116          | 224116        | SAMN06447728       | 6447728     | strain   | DSM20285  | 39694    | Kyungpook National University                                                                             | representative genome | from-type                  | GCA_002982135.1 | GCF_002982135.1 | identical  | 2137091   | 2137091     |
| GCF_001611155.1   | ASM161115v1  | 51663  | Pediococcus damnosus (firmicutes)               | 51663        | Pediococcus damnosus     | Complete Genome | PRJNA290141         | 290141       | PRJNA224116          | 224116        | SAMN03876485       | 3876485     | strain   | TMW2.1536 | 137      | Technische Universität Muenchen                                                                           | representative genome | full-genome-representation | GCA_001611155.1 | GCF_001611155.1 | identical  | 2125430   | 2125430     |
| GCF_013127755.1   | ASM1312775v1 | 1254   | Pediococcus acidilactici (firmicutes)           | 1254         | Pediococcus acidilactici | Complete Genome | PRJNA632644         | 632644       | PRJNA224116          | 224116        | SAMN14916503       | 14916503    | strain   | PMC65     | 48233    | Probiotics Microbiome Convergence Center                                                                  | representative genome | full-genome-representation | GCA_001312775.1 | GCF_001312775.1 | identical  | 2044083   | 2044083     |
| GCF_001702215.1   | ASM170221v1  | 187452 | Pediococcus clausenii (firmicutes)              | 187452       | Pediococcus clausenii    | Complete Genome | PRJNA290141         | 290141       | PRJNA224116          | 224116        | SAMN04505731       | 4505731     | strain   | TMW2.53   | 192      | Technische Universität Muenchen                                                                           | representative genome | full-genome-representation | GCA_001702215.1 | GCF_001702215.1 | identical  | 1889038   | 1889038     |
| GCF_000014505.1   | ASM1450v1    | 278197 | Pediococcus pentosaceus ATCC 25745 (firmicutes) | 278197       | Pediococcus pentosaceus  | Complete Genome | PRJNA398            | 398          | PRJNA224116          | 224116        | SAMN02598525       | 2598525     | strain   | ATC25745  | 0        | US DOE Joint Genome Institute (JGI), The Lactic Acid Bacteria Genome Consortium and Fidelity Systems Inc. | representative genome | full-genome-representation | GCA_000014505.1 | GCF_000014505.1 | identical  | 1832387   | 1832387     |
| GCF_001438655.1   | ASM143865v1  | 319652 | Pediococcus cellicolus (firmicutes)             | 319652       | Pediococcus cellicolus   | Contig          | PRJNA222257         | 222257       | PRJNA224116          | 224116        | SAMN02797811       | 2797811     | strain   | DSM17757  | 100      | Shanghai Majorbio                                                                                         | representative genome | from-type                  | GCA_001438655.1 | GCF_001438655.1 | identical  | 218167    | 218167      |
| GCF_001437075.1   | ASM143707v1  | 331679 | Pediococcus stilesii (firmicutes)               | 331679       | Pediococcus stilesii     | Contig          | PRJNA222257         | 222257       | PRJNA224116          | 224116        | SAMN02797812       | 2797812     | strain   | DSM18001  | 100      | Shanghai Majorbio                                                                                         | representative genome | from-type                  | GCA_001437075.1 | GCF_001437075.1 | identical  | 98964     | 98964       |

|                     |                  |            |                                                              |            |                             |                    |                 |            |                 |            |                  |              |        |                        |     |                                                                  |                          |                               |                         |                         |           |             |             |
|---------------------|------------------|------------|--------------------------------------------------------------|------------|-----------------------------|--------------------|-----------------|------------|-----------------|------------|------------------|--------------|--------|------------------------|-----|------------------------------------------------------------------|--------------------------|-------------------------------|-------------------------|-------------------------|-----------|-------------|-------------|
| GCF_001<br>437405.1 | ASM14<br>3740v1  | 319<br>653 | Pediococcus<br>ethanolans<br>(firmicutes)                    | 31965<br>3 | Pediococcus<br>ethanolans   | Contig             | PRJNA<br>222257 | 22225<br>7 | PRJNA<br>224116 | 22411<br>6 | SAMN0<br>2797818 | 27978<br>18  | strain | DSM<br>22301           | 100 | Shanghai<br>Majorbio                                             | representative<br>genome | from-type                     | GCA_0<br>0143740<br>5.1 | GCF_00<br>1437405<br>.1 | identical | 9484<br>8   | 94848       |
| GCF_012<br>396535.1 | ASM12<br>39653v1 | 480<br>391 | Pediococcus<br>argentinicus<br>(firmicutes)                  | 48039<br>1 | Pediococcus<br>argentinicus | Contig             | PRJNA<br>622446 | 62244<br>6 | PRJNA<br>224116 | 22411<br>6 | SAMN1<br>4517845 | 14517<br>845 | strain | CCU<br>G<br>54535      | 199 | Bacterial<br>Special<br>Pathogens<br>Branch<br>(CDC)             | representative<br>genome | from-type                     | GCA_0<br>1239653<br>5.1 | GCF_01<br>2396535<br>.1 | identical | 4751<br>7   | 47517       |
| GCF_007<br>990205.1 | ASM79<br>9020v1  | 540<br>62  | Pediococcus<br>parvulus<br>(firmicutes)                      | 54062      | Pediococcus<br>parvulus     | Contig             | PRJDB<br>6092   | 39640<br>2 | PRJNA<br>224116 | 22411<br>6 | SAMD0<br>0166260 | 11337<br>974 | strain | NBR<br>C<br>10067<br>3 | 124 | National<br>Institute of<br>Technology and<br>Evaluation         | representative<br>genome | from-type                     | GCA_0<br>0799020<br>5.1 | GCF_00<br>7990205<br>.1 | identical | 4021<br>0   | 40210       |
| GCF_000<br>237995.1 | ASM23<br>799v2   | 701<br>521 | Pediococcus<br>claussenii<br>ATCC<br>BAA-344<br>(firmicutes) | 18745<br>2 | Pediococcus<br>claussenii   | Complete<br>Genome | PRJNA<br>42741  | 42741      | PRJNA<br>224116 | 22411<br>6 | SAMN0<br>2604240 | 26042<br>40  | strain | ATC<br>C<br>BAA-344    | 0   | University of<br>Saskatchewan                                    | na                       | from-type                     | GCA_0<br>0023799<br>5.2 | GCF_00<br>0237995<br>.1 | identical | 1829<br>111 | 18291<br>11 |
| GCF_001<br>611135.1 | ASM16<br>1113v1  | 516<br>63  | Pediococcus<br>damnosus<br>(firmicutes)                      | 51663      | Pediococcus<br>damnosus     | Complete<br>Genome | PRJNA<br>290141 | 29014<br>1 | PRJNA<br>224116 | 22411<br>6 | SAMN0<br>3876484 | 38764<br>84  | strain | TMW<br>2.153<br>5      | 142 | Technische<br>Universitaet<br>Muenchen                           | na                       | full-genome<br>representation | GCA_0<br>0161113<br>5.1 | GCF_00<br>1611135<br>.1 | identical | 2247<br>318 | 22473<br>18 |
| GCF_001<br>611115.1 | ASM16<br>1111v1  | 516<br>63  | Pediococcus<br>damnosus<br>(firmicutes)                      | 51663      | Pediococcus<br>damnosus     | Complete<br>Genome | PRJNA<br>290141 | 29014<br>1 | PRJNA<br>224116 | 22411<br>6 | SAMN0<br>3876483 | 38764<br>83  | strain | TMW<br>2.153<br>4      | 138 | Technische<br>Universitaet<br>Muenchen                           | na                       | full-genome<br>representation | GCA_0<br>0161111<br>5.1 | GCF_00<br>1611115<br>.1 | identical | 2172<br>287 | 21722<br>87 |
| GCF_001<br>611075.1 | ASM16<br>1107v1  | 516<br>63  | Pediococcus<br>damnosus<br>(firmicutes)                      | 51663      | Pediococcus<br>damnosus     | Complete<br>Genome | PRJNA<br>290141 | 29014<br>1 | PRJNA<br>224116 | 22411<br>6 | SAMN0<br>3876482 | 38764<br>82  | strain | TMW<br>2.153<br>3      | 92  | Technische<br>Universitaet<br>Muenchen                           | na                       | full-genome<br>representation | GCA_0<br>0161107<br>5.1 | GCF_00<br>1611075<br>.1 | identical | 2149<br>374 | 21493<br>74 |
| GCF_001<br>767275.1 | ASM17<br>6727v1  | 125<br>4   | Pediococcus<br>acidilactici<br>(firmicutes)                  | 1254       | Pediococcus<br>acidilactici | Complete<br>Genome | PRJNA<br>312971 | 31297<br>1 | PRJNA<br>224116 | 22411<br>6 | SAMN0<br>4515708 | 45157<br>08  | strain | ZPA0<br>17             | 0   | Beijing<br>Academy of<br>Agriculture and<br>Forestry<br>Sciences | na                       | full-genome<br>representation | GCA_0<br>0176727<br>5.1 | GCF_00<br>1767275<br>.1 | identical | 2131<br>361 | 21313<br>61 |

|                     |                  |           |                                             |       |                             |                    |                 |            |                 |            |                  |              |        |                    |            |                                                                                                    |    |                                    |                         |                         |           |             |             |
|---------------------|------------------|-----------|---------------------------------------------|-------|-----------------------------|--------------------|-----------------|------------|-----------------|------------|------------------|--------------|--------|--------------------|------------|----------------------------------------------------------------------------------------------------|----|------------------------------------|-------------------------|-------------------------|-----------|-------------|-------------|
| GCF_001<br>922325.1 | ASM19<br>2232v1  | 125<br>4  | Pediococcus<br>acidilactici<br>(firmicutes) | 1254  | Pediococcus<br>acidilactici | Complete<br>Genome | PRJNA<br>357663 | 35766<br>3 | PRJNA<br>224116 | 22411<br>6 | SAMN0<br>6052263 | 60522<br>63  | strain | BCC1               | 415        | China<br>Agricultural<br>University                                                                | na | full-<br>genome-<br>representation | GCA_0<br>0192232<br>5.1 | GCF_00<br>1922325<br>.1 | identical | 2096<br>059 | 20960<br>59 |
| GCF_006<br>770685.1 | ASM67<br>7068v1  | 125<br>4  | Pediococcus<br>acidilactici<br>(firmicutes) | 1254  | Pediococcus<br>acidilactici | Complete<br>Genome | PRJNA<br>412124 | 41212<br>4 | PRJNA<br>224116 | 22411<br>6 | SAMN0<br>7701376 | 77013<br>76  | strain | JQII-5             | 200        | BGI                                                                                                | na | full-<br>genome-<br>representation | GCA_0<br>0677068<br>5.1 | GCF_00<br>6770685<br>.1 | identical | 2085<br>679 | 20856<br>79 |
| GCF_001<br>611035.1 | ASM16<br>1103v1  | 516<br>63 | Pediococcus<br>damnosus<br>(firmicutes)     | 51663 | Pediococcus<br>damnosus     | Complete<br>Genome | PRJNA<br>290141 | 29014<br>1 | PRJNA<br>224116 | 22411<br>6 | SAMN0<br>3876481 | 38764<br>81  | strain | TMW<br>2.153<br>2  | 144        | Technische<br>Universitaet<br>Muenchen                                                             | na | full-<br>genome-<br>representation | GCA_0<br>0161103<br>5.1 | GCF_00<br>1611035<br>.1 | identical | 2073<br>735 | 20737<br>35 |
| GCF_011<br>604585.1 | ASM11<br>60458v1 | 125<br>4  | Pediococcus<br>acidilactici<br>(firmicutes) | 1254  | Pediococcus<br>acidilactici | Complete<br>Genome | PRJNA<br>612145 | 61214<br>5 | PRJNA<br>224116 | 22411<br>6 | SAMN1<br>4362951 | 14362<br>951 | strain | PMC<br>48          | 209.<br>81 | Probiotics<br>Microbiome<br>Convergence<br>Center                                                  | na | full-<br>genome-<br>representation | GCA_0<br>1160458<br>5.1 | GCF_01<br>1604585<br>.1 | identical | 2043<br>929 | 20439<br>29 |
| GCF_010<br>092385.1 | ASM10<br>09238v1 | 125<br>4  | Pediococcus<br>acidilactici<br>(firmicutes) | 1254  | Pediococcus<br>acidilactici | Complete<br>Genome | PRJNA<br>601629 | 60162<br>9 | PRJNA<br>224116 | 22411<br>6 | SAMN1<br>3871425 | 13871<br>425 | strain | CAC<br>C 537       | 12         | Center for<br>Industrializa-<br>tion of<br>Agricultural<br>and<br>Livestock<br>Microorga-<br>nisms | na | full-<br>genome-<br>representation | GCA_0<br>1009238<br>5.1 | GCF_01<br>0092385<br>.1 | identical | 2035<br>984 | 20359<br>84 |
| GCF_002<br>174215.1 | ASM21<br>7421v1  | 125<br>4  | Pediococcus<br>acidilactici<br>(firmicutes) | 1254  | Pediococcus<br>acidilactici | Complete<br>Genome | PRJNA<br>388027 | 38802<br>7 | PRJNA<br>224116 | 22411<br>6 | SAMN0<br>7167785 | 71677<br>85  | strain | SRC<br>M101<br>189 | 133<br>8   | Microbial<br>Institute for<br>Fermentation<br>Industry                                             | na | full-<br>genome-<br>representation | GCA_0<br>0217421<br>5.1 | GCF_00<br>2174215<br>.1 | identical | 2025<br>732 | 20257<br>32 |
| GCF_002<br>173575.1 | ASM21<br>7357v1  | 125<br>4  | Pediococcus<br>acidilactici<br>(firmicutes) | 1254  | Pediococcus<br>acidilactici | Complete<br>Genome | PRJNA<br>386762 | 38676<br>2 | PRJNA<br>224116 | 22411<br>6 | SAMN0<br>7126147 | 71261<br>47  | strain | SRC<br>M100<br>424 | 628        | Microbial<br>Institute for<br>Fermentation<br>Industry                                             | na | full-<br>genome-<br>representation | GCA_0<br>0217357<br>5.1 | GCF_00<br>2173575<br>.1 | identical | 2025<br>714 | 20257<br>14 |
| GCF_002<br>173595.1 | ASM21<br>7359v1  | 125<br>4  | Pediococcus<br>acidilactici<br>(firmicutes) | 1254  | Pediococcus<br>acidilactici | Complete<br>Genome | PRJNA<br>386761 | 38676<br>1 | PRJNA<br>224116 | 22411<br>6 | SAMN0<br>7125954 | 71259<br>54  | strain | SRC<br>M100<br>313 | 607        | Microbial<br>Institute for<br>Fermentation<br>Industry                                             | na | full-<br>genome-<br>representation | GCA_0<br>0217359<br>5.1 | GCF_00<br>2173595<br>.1 | identical | 2025<br>575 | 20255<br>75 |
| GCF_009<br>913895.1 | ASM99<br>1389v1  | 125<br>4  | Pediococcus<br>acidilactici                 | 1254  | Pediococcus<br>acidilactici | Complete<br>Genome | PRJNA<br>438180 | 43818<br>0 | PRJNA<br>224116 | 22411<br>6 | SAMN0<br>8707607 | 87076<br>07  | strain | SRC<br>M102<br>732 | 447        | Microbial<br>Institute for<br>Fermentation                                                         | na | full-<br>genome-<br>representation | GCA_0<br>0991389<br>5.1 | GCF_00<br>9913895<br>.1 | identical | 2018<br>117 | 20181<br>17 |

|                     |                 |            |                                             |        |                             |                    |                 |        |                 |        |                  |          |        |                    |             |                                                           |          |                               |                         |                         |           |             |             |
|---------------------|-----------------|------------|---------------------------------------------|--------|-----------------------------|--------------------|-----------------|--------|-----------------|--------|------------------|----------|--------|--------------------|-------------|-----------------------------------------------------------|----------|-------------------------------|-------------------------|-------------------------|-----------|-------------|-------------|
|                     |                 |            | (firmicutes)                                |        |                             |                    |                 |        |                 |        |                  |          |        |                    | on Industry |                                                           | entation |                               |                         |                         |           |             |             |
| GCF_009<br>913875.1 | ASM99<br>1387v1 | 125<br>4   | Pediococcus<br>acidilactici<br>(firmicutes) | 1254   | Pediococcus<br>acidilactici | Complete<br>Genome | PRJNA<br>438180 | 438180 | PRJNA<br>224116 | 224116 | SAMN0<br>8707606 | 8707606  | strain | SRC<br>M102<br>731 | 355         | Microbial<br>Institute<br>for<br>Fermentation<br>Industry | na       | full-genome<br>representation | GCA_0<br>0991387<br>5.1 | GCF_00<br>9913875<br>.1 | identical | 2015<br>015 | 20150<br>15 |
| GCF_004<br>355265.1 | ASM43<br>5526v1 | 125<br>4   | Pediococcus<br>acidilactici<br>(firmicutes) | 1254   | Pediococcus<br>acidilactici | Complete<br>Genome | PRJNA<br>503305 | 503305 | PRJNA<br>224116 | 224116 | SAMN1<br>0358339 | 10358339 | strain | ATC<br>C<br>8042   | 531         | Seoul<br>National<br>University                           | na       | full-genome<br>representation | GCA_0<br>0435526<br>5.1 | GCF_00<br>4355265<br>.1 | identical | 2009<br>598 | 20095<br>98 |
| GCF_004<br>101585.1 | ASM41<br>0158v1 | 125<br>4   | Pediococcus<br>acidilactici<br>(firmicutes) | 1254   | Pediococcus<br>acidilactici | Complete<br>Genome | PRJNA<br>515148 | 515148 | PRJNA<br>224116 | 224116 | SAMN1<br>0743318 | 10743318 | strain | SRC<br>M103<br>387 | 310.<br>93  | Microbial<br>Institute<br>for<br>Fermentation<br>Industry | na       | full-genome<br>representation | GCA_0<br>0410158<br>5.1 | GCF_00<br>4101585<br>.1 | identical | 2001<br>079 | 20010<br>79 |
| GCF_004<br>103635.1 | ASM41<br>0363v1 | 125<br>4   | Pediococcus<br>acidilactici<br>(firmicutes) | 1254   | Pediococcus<br>acidilactici | Complete<br>Genome | PRJNA<br>515377 | 515377 | PRJNA<br>224116 | 224116 | SAMN1<br>0754287 | 10754287 | strain | SRC<br>M103<br>444 | 346.<br>26  | Microbial<br>Institute<br>for<br>Fermentation<br>Industry | na       | full-genome<br>representation | GCA_0<br>0410363<br>5.1 | GCF_00<br>4103635<br>.1 | identical | 1970<br>727 | 19707<br>27 |
| GCF_003<br>957355.1 | ASM39<br>5735v1 | 125<br>4   | Pediococcus<br>acidilactici<br>(firmicutes) | 1254   | Pediococcus<br>acidilactici | Complete<br>Genome | PRJNA<br>422477 | 422477 | PRJNA<br>224116 | 224116 | SAMN0<br>8180273 | 8180273  | strain |                    |             | Korea<br>Food<br>Research<br>Institute                    | na       | full-genome<br>representation | GCA_0<br>0395735<br>5.1 | GCF_00<br>3957355<br>.1 | identical | 1955<br>616 | 19556<br>16 |
| GCF_001<br>702235.1 | ASM17<br>0223v1 | 187<br>452 | Pediococcus<br>clausenii<br>(firmicutes)    | 187452 | Pediococcus<br>clausenii    | Complete<br>Genome | PRJNA<br>290141 | 290141 | PRJNA<br>224116 | 224116 | SAMN0<br>4505732 | 4505732  | strain | TMW<br>2.54        | 146         | Technische<br>Universitaet<br>Muenchen                    | na       | full-genome<br>representation | GCA_0<br>0170223<br>5.1 | GCF_00<br>1702235<br>.1 | identical | 1886<br>832 | 18868<br>32 |
| GCF_004<br>102605.1 | ASM41<br>0260v1 | 125<br>4   | Pediococcus<br>acidilactici<br>(firmicutes) | 1254   | Pediococcus<br>acidilactici | Complete<br>Genome | PRJNA<br>515147 | 515147 | PRJNA<br>224116 | 224116 | SAMN1<br>0743317 | 10743317 | strain | SRC<br>M103<br>367 | 234.<br>7   | Microbial<br>Institute<br>for<br>Fermentation<br>Industry | na       | full-genome<br>representation | GCA_0<br>0410260<br>5.1 | GCF_00<br>4102605<br>.1 | identical | 1852<br>892 | 18528<br>92 |
| GCF_007<br>923185.1 | ASM79<br>2318v1 | 125<br>5   | Pediococcus<br>pentosaceus<br>(firmicutes)  | 1255   | Pediococcus<br>pentosaceus  | Complete<br>Genome | PRJNA<br>526333 | 526333 | PRJNA<br>224116 | 224116 | SAMN1<br>1094516 | 11094516 | strain |                    | 575<br>8    | Hunan<br>Normal<br>University                             | na       | full-genome<br>representation | GCA_0<br>0792318<br>5.1 | GCF_00<br>7923185<br>.1 | identical | 1842<br>476 | 18424<br>76 |
| GCF_009<br>791435.1 | ASM97<br>9143v1 | 125<br>5   | Pediococcus<br>pentosaceus                  | 1255   | Pediococcus                 | Complete           | PRJNA<br>596038 | 596038 | PRJNA<br>224116 | 224116 | SAMN1<br>3611447 | 13611447 | strain | GDIA<br>S001       | 250         | Guangdong<br>Academy                                      | na       | full-genome                   | GCA_0<br>0979143<br>5.1 | GCF_00<br>9791435<br>.1 | identical | 1831<br>351 | 18313<br>51 |

|                     |                 |                 |                                                               |      |                                    |                            |                 |            |                 |            |                  |             |            |                    |                                 |                                                               |                        |                                                |                         |                         |               |             |             |
|---------------------|-----------------|-----------------|---------------------------------------------------------------|------|------------------------------------|----------------------------|-----------------|------------|-----------------|------------|------------------|-------------|------------|--------------------|---------------------------------|---------------------------------------------------------------|------------------------|------------------------------------------------|-------------------------|-------------------------|---------------|-------------|-------------|
|                     |                 |                 | aceus<br>(firmic<br>utes)                                     |      | pentos<br>aceus                    | Genom<br>e                 |                 |            |                 |            |                  |             |            |                    | of<br>Agricultur<br>al Sciences |                                                               | repres<br>entati<br>on |                                                |                         |                         |               |             |             |
| GCF_009<br>914035.1 | ASM99<br>1403v1 | 125<br>5        | Pedioc<br>occus<br>pentos<br>aceus<br>(firmic<br>utes)        | 1255 | Pedioc<br>occus<br>pentos<br>aceus | Compl<br>ete<br>Genom<br>e | PRJNA<br>438180 | 43818<br>0 | PRJNA<br>224116 | 22411<br>6 | SAMN0<br>8707615 | 87076<br>15 | strai<br>n | SRC<br>M102<br>740 | 789                             | Microbial<br>Institute<br>for<br>Fermentati<br>on<br>Industry | na                     | full-<br>geno<br>me-<br>repres<br>entati<br>on | GCA_0<br>0991403<br>5.1 | GCF_00<br>9914035<br>.1 | iden<br>tical | 1818<br>150 | 18181<br>50 |
| GCF_009<br>913995.1 | ASM99<br>1399v1 | 125<br>5        | Pedioc<br>occus<br>pentos<br>aceus<br>(firmic<br>utes)        | 1255 | Pedioc<br>occus<br>pentos<br>aceus | Compl<br>ete<br>Genom<br>e | PRJNA<br>438180 | 43818<br>0 | PRJNA<br>224116 | 22411<br>6 | SAMN0<br>8707613 | 87076<br>13 | strai<br>n | SRC<br>M102<br>738 | 750                             | Microbial<br>Institute<br>for<br>Fermentati<br>on<br>Industry | na                     | full-<br>geno<br>me-<br>repres<br>entati<br>on | GCA_0<br>0991399<br>5.1 | GCF_00<br>9913995<br>.1 | iden<br>tical | 1818<br>149 | 18181<br>49 |
| GCF_009<br>914015.1 | ASM99<br>1401v1 | 125<br>5        | Pedioc<br>occus<br>pentos<br>aceus<br>(firmic<br>utes)        | 1255 | Pedioc<br>occus<br>pentos<br>aceus | Compl<br>ete<br>Genom<br>e | PRJNA<br>438180 | 43818<br>0 | PRJNA<br>224116 | 22411<br>6 | SAMN0<br>8707614 | 87076<br>14 | strai<br>n | SRC<br>M102<br>739 | 362                             | Microbial<br>Institute<br>for<br>Fermentati<br>on<br>Industry | na                     | full-<br>geno<br>me-<br>repres<br>entati<br>on | GCA_0<br>0991401<br>5.1 | GCF_00<br>9914015<br>.1 | iden<br>tical | 1818<br>149 | 18181<br>49 |
| GCF_000<br>496265.1 | ASM49<br>626v1  | 140<br>820<br>6 | Pedioc<br>occus<br>pentos<br>aceus<br>SL4<br>(firmic<br>utes) | 1255 | Pedioc<br>occus<br>pentos<br>aceus | Compl<br>ete<br>Genom<br>e | PRJNA<br>222573 | 22257<br>3 | PRJNA<br>224116 | 22411<br>6 | SAMN0<br>2603952 | 26039<br>52 | strai<br>n | SL4                | 370<br>0                        | The<br>Technical<br>University<br>of<br>Denmark               | na                     | full-<br>geno<br>me-<br>repres<br>entati<br>on | GCA_0<br>0049626<br>5.1 | GCF_00<br>0496265<br>.1 | iden<br>tical | 1789<br>138 | 17891<br>38 |
| GCF_002<br>173535.1 | ASM21<br>7353v1 | 125<br>5        | Pedioc<br>occus<br>pentos<br>aceus<br>(firmic<br>utes)        | 1255 | Pedioc<br>occus<br>pentos<br>aceus | Compl<br>ete<br>Genom<br>e | PRJNA<br>386763 | 38676<br>3 | PRJNA<br>224116 | 22411<br>6 | SAMN0<br>7126152 | 71261<br>52 | strai<br>n | SRC<br>M100<br>892 | 594                             | Microbial<br>Institiue<br>for<br>Fermentati<br>on<br>Industry | na                     | full-<br>geno<br>me-<br>repres<br>entati<br>on | GCA_0<br>0217353<br>5.1 | GCF_00<br>2173535<br>.1 | iden<br>tical | 1785<br>266 | 17852<br>66 |
| GCF_002<br>982155.1 | ASM29<br>8215v1 | 125<br>5        | Pedioc<br>occus<br>pentos<br>aceus<br>(firmic<br>utes)        | 1255 | Pedioc<br>occus<br>pentos<br>aceus | Compl<br>ete<br>Genom<br>e | PRJNA<br>376813 | 37681<br>3 | PRJNA<br>224116 | 22411<br>6 | SAMN0<br>6447729 | 64477<br>29 | strai<br>n | KCC<br>M<br>40703  | 460.<br>75                      | Kyungpoo<br>k National<br>University                          | na                     | full-<br>geno<br>me-<br>repres<br>entati<br>on | GCA_0<br>0298215<br>5.1 | GCF_00<br>2982155<br>.1 | iden<br>tical | 1758<br>362 | 17583<br>62 |
| GCF_002<br>202155.1 | ASM22<br>0215v1 | 125<br>5        | Pedioc<br>occus<br>pentos<br>aceus<br>(firmic<br>utes)        | 1255 | Pedioc<br>occus<br>pentos<br>aceus | Compl<br>ete<br>Genom<br>e | PRJNA<br>390207 | 39020<br>7 | PRJNA<br>224116 | 22411<br>6 | SAMN0<br>7224387 | 72243<br>87 | strai<br>n | SRC<br>M100<br>194 | 264<br>3                        | Microbial<br>Institute<br>for<br>Fermentati<br>on<br>Industry | na                     | full-<br>geno<br>me-<br>repres<br>entati<br>on | GCA_0<br>0220215<br>5.1 | GCF_00<br>2202155<br>.1 | iden<br>tical | 1757<br>573 | 17575<br>73 |
| GCF_009<br>913955.1 | ASM99<br>1395v1 | 125<br>5        | Pedioc<br>occus<br>pentos<br>aceus<br>(firmic<br>utes)        | 1255 | Pedioc<br>occus<br>pentos<br>aceus | Compl<br>ete<br>Genom<br>e | PRJNA<br>438180 | 43818<br>0 | PRJNA<br>224116 | 22411<br>6 | SAMN0<br>8707611 | 87076<br>11 | strai<br>n | SRC<br>M102<br>736 | 568                             | Microbial<br>Institute<br>for<br>Fermentati<br>on<br>Industry | na                     | full-<br>geno<br>me-<br>repres<br>entati<br>on | GCA_0<br>0991395<br>5.1 | GCF_00<br>9913955<br>.1 | iden<br>tical | 1756<br>764 | 17567<br>64 |

|                     |                  |            |                                                             |      |                             |                    |                 |            |                 |            |                  |              |                              |           |                                                           |    |                                    |                         |                         |           |             |             |
|---------------------|------------------|------------|-------------------------------------------------------------|------|-----------------------------|--------------------|-----------------|------------|-----------------|------------|------------------|--------------|------------------------------|-----------|-----------------------------------------------------------|----|------------------------------------|-------------------------|-------------------------|-----------|-------------|-------------|
| GCF_003<br>429405.1 | ASM34<br>2940v1  | 125<br>5   | Pediococcus<br>pentosaceus<br>(firmicutes)                  | 1255 | Pediococcus<br>pentosaceus  | Complete<br>Genome | PRJNA<br>399825 | 39982<br>5 | PRJNA<br>224116 | 22411<br>6 | SAMN0<br>7551496 | 75514<br>96  | strain<br>SS1-3              | 341       | Korea<br>Food<br>Research<br>Institute                    | na | full-<br>genome-<br>representation | GCA_0<br>0342940<br>5.1 | GCF_00<br>3429405<br>.1 | identical | 1752<br>312 | 17523<br>12 |
| GCF_001<br>411765.2 | ASM14<br>1176v2  | 125<br>5   | Pediococcus<br>pentosaceus<br>(firmicutes)                  | 1255 | Pediococcus<br>pentosaceus  | Complete<br>Genome | PRJNA<br>260124 | 26012<br>4 | PRJNA<br>224116 | 22411<br>6 | SAMN0<br>4017317 | 40173<br>17  | strain<br>wiki<br>m20        | 621.<br>6 | WIKIM                                                     | na | full-<br>genome-<br>representation | GCA_0<br>0141176<br>5.2 | GCF_00<br>1411765<br>.2 | identical | 1739<br>283 | 17392<br>83 |
| GCF_006<br>770865.1 | ASM67<br>7086v1  | 125<br>5   | Pediococcus<br>pentosaceus<br>(firmicutes)                  | 1255 | Pediococcus<br>pentosaceus  | Complete<br>Genome | PRJNA<br>412135 | 41213<br>5 | PRJNA<br>224116 | 22411<br>6 | SAMN0<br>7701459 | 77014<br>59  | strain<br>JQI-7              | 200       | BGI                                                       | na | full-<br>genome-<br>representation | GCA_0<br>0677086<br>5.1 | GCF_00<br>6770865<br>.1 | identical | 1732<br>880 | 17328<br>80 |
| GCF_009<br>930955.1 | ASM99<br>3095v1  | 125<br>5   | Pediococcus<br>pentosaceus<br>(firmicutes)                  | 1255 | Pediococcus<br>pentosaceus  | Complete<br>Genome | PRJNA<br>438180 | 43818<br>0 | PRJNA<br>224116 | 22411<br>6 | SAMN0<br>8707609 | 87076<br>09  | strain<br>SRC<br>M102<br>734 | 487       | Microbial<br>Institute<br>for<br>Fermentation<br>Industry | na | full-<br>genome-<br>representation | GCA_0<br>0993095<br>5.1 | GCF_00<br>9930955<br>.1 | identical | 1707<br>614 | 17076<br>14 |
| GCF_000<br>146325.1 | ASM14<br>632v1   | 862<br>514 | Pediococcus<br>acidilactici<br>DSM<br>20284<br>(firmicutes) | 1254 | Pediococcus<br>acidilactici | Scaffold           | PRJNA<br>50527  | 50527      | PRJNA<br>224116 | 22411<br>6 | SAMN0<br>0116807 | 11680<br>7   | strain<br>DSM<br>20284       | 130       | Baylor<br>College of<br>Medicine                          | na | from-<br>type                      | GCA_0<br>0014632<br>5.1 | GCF_00<br>0146325<br>.1 | identical | 4250<br>94  | 19376<br>22 |
| GCF_012<br>396515.1 | ASM12<br>39651v1 | 125<br>4   | Pediococcus<br>acidilactici<br>(firmicutes)                 | 1254 | Pediococcus<br>acidilactici | Contig             | PRJNA<br>622446 | 62244<br>6 | PRJNA<br>224116 | 22411<br>6 | SAMN1<br>4517844 | 14517<br>844 | strain<br>CCU<br>G<br>32235  | 162.<br>8 | Bacterial<br>Special<br>Pathogens<br>Branch<br>(CDC)      | na | from-<br>type                      | GCA_0<br>1239651<br>5.1 | GCF_01<br>2396515<br>.1 | identical | 4462<br>49  | 44624<br>9  |
| GCF_001<br>437115.1 | ASM14<br>3711v1  | 125<br>4   | Pediococcus<br>acidilactici<br>(firmicutes)                 | 1254 | Pediococcus<br>acidilactici | Scaffold           | PRJNA<br>222257 | 22225<br>7 | PRJNA<br>224116 | 22411<br>6 | SAMN0<br>2797813 | 27978<br>13  | strain<br>DSM<br>19927       | 100       | Shanghai<br>Majorbio                                      | na | from-<br>type                      | GCA_0<br>0143711<br>5.1 | GCF_00<br>1437115<br>.1 | identical | 3188<br>66  | 31886<br>6  |
| GCF_004<br>354495.1 | ASM43<br>5449v1  | 125<br>5   | Pediococcus<br>pentosaceus<br>(firmicutes)                  | 1255 | Pediococcus<br>pentosaceus  | Contig             | PRJNA<br>434256 | 43425<br>6 | PRJNA<br>224116 | 22411<br>6 | SAMN0<br>8543181 | 85431<br>81  | strain<br>ATC<br>C<br>33316  | 60        | Carlsberg<br>Research<br>Laboratory                       | na | from-<br>type                      | GCA_0<br>0435449<br>5.1 | GCF_00<br>4354495<br>.1 | identical | 3023<br>47  | 30234<br>7  |
| GCF_001<br>437285.1 | ASM14<br>3728v1  | 125<br>5   | Pediococcus<br>pentosaceus                                  | 1255 | Pediococcus<br>pentosaceus  | Contig             | PRJNA<br>222257 | 22225<br>7 | PRJNA<br>224116 | 22411<br>6 | SAMN0<br>2797817 | 27978<br>17  | strain<br>DSM<br>20336       | 100       | Shanghai<br>Majorbio                                      | na | from-<br>type                      | GCA_0<br>0143728<br>5.1 | GCF_00<br>1437285<br>.1 | identical | 2959<br>19  | 29591<br>9  |

|                     |                                                      |                 |                                                  |            |                            |          |                 |            |                 |            |                  |              |        |                         |            |                                                                                               |    |                            |                         |                         |           |             |             |
|---------------------|------------------------------------------------------|-----------------|--------------------------------------------------|------------|----------------------------|----------|-----------------|------------|-----------------|------------|------------------|--------------|--------|-------------------------|------------|-----------------------------------------------------------------------------------------------|----|----------------------------|-------------------------|-------------------------|-----------|-------------|-------------|
|                     |                                                      |                 | (firmicutes)                                     |            |                            |          |                 |            |                 |            |                  |              |        |                         |            |                                                                                               |    |                            |                         |                         |           |             |             |
| GCF_001<br>436905.1 | ASM14<br>3690v1                                      | 187<br>452      | Pediococcus clausenii (firmicutes)               | 18745<br>2 | Pediococcus clausenii      | Scaffold | PRJNA<br>222257 | 22225<br>7 | PRJNA<br>224116 | 22411<br>6 | SAMN0<br>2797810 | 27978<br>10  | strain | DSM<br>14800            | 100        | Shanghai Majorbio                                                                             | na | from-type                  | GCA_0<br>0143690<br>5.1 | GCF_00<br>1436905<br>.1 | identical | 2042<br>00  | 21983<br>8  |
| GCF_000<br>319265.1 | Plo_1.0                                              | 122<br>928<br>1 | Pediococcus acidilactici NGRI 0510Q (firmicutes) | 1254       | Pediococcus acidilactici   | Contig   | PRJDB<br>499    | 17440<br>8 | PRJNA<br>224116 | 22411<br>6 | SAMD0<br>0036646 | 40916<br>11  | strain | NGRI<br>0510<br>Q       | 232        | Microbial Genetics, Institute of Genetic Resources, Faculty of Agriculture, Kyushu University | na | from-type                  | GCA_0<br>0031926<br>5.1 | GCF_00<br>0319265<br>.1 | identical | 1023<br>22  | 10232<br>2  |
| GCF_900<br>111205.1 | IMG-taxon<br>261727<br>0883<br>annotated<br>assembly | 319<br>653      | Pediococcus ethanolidurans (firmicutes)          | 31965<br>3 | Pediococcus ethanolidurans | Scaffold | PRJEB<br>17023  | 35120<br>7 | PRJNA<br>224116 | 22411<br>6 | SAMN0<br>4487973 | 44879<br>73  | strain | CGM<br>CC<br>1.388<br>9 | 624        | DOE - JOINT GENOME INSTITUTE E                                                                | na | from-type                  | GCA_9<br>0011120<br>5.1 | GCF_90<br>0111205<br>.1 | identical | 7443<br>3   | 10084<br>4  |
| GCF_001<br>437605.1 | ASM14<br>3760v1                                      | 480<br>391      | Pediococcus argentinicus (firmicutes)            | 48039<br>1 | Pediococcus argentinicus   | Scaffold | PRJNA<br>222257 | 22225<br>7 | PRJNA<br>224116 | 22411<br>6 | SAMN0<br>2797819 | 27978<br>19  | strain | DSM<br>23026            | 100        | Shanghai Majorbio                                                                             | na | from-type                  | GCA_0<br>0143760<br>5.1 | GCF_00<br>1437605<br>.1 | identical | 4365<br>7   | 43657       |
| GCF_001<br>438725.1 | ASM14<br>3872v1                                      | 114<br>090      | Pediococcus inopinatus (firmicutes)              | 11409<br>0 | Pediococcus inopinatus     | Contig   | PRJNA<br>222257 | 22225<br>7 | PRJNA<br>224116 | 22411<br>6 | SAMN0<br>2797814 | 27978<br>14  | strain | DSM<br>20285            | 100        | Shanghai Majorbio                                                                             | na | from-type                  | GCA_0<br>0143872<br>5.1 | GCF_00<br>1438725<br>.1 | identical | 3792<br>3   | 37923       |
| GCF_001<br>437255.1 | ASM14<br>3725v1                                      | 516<br>63       | Pediococcus damnosus (firmicutes)                | 51663      | Pediococcus damnosus       | Contig   | PRJNA<br>222257 | 22225<br>7 | PRJNA<br>224116 | 22411<br>6 | SAMN0<br>2797815 | 27978<br>15  | strain | DSM<br>20331            | 100        | Shanghai Majorbio                                                                             | na | from-type                  | GCA_0<br>0143725<br>5.1 | GCF_00<br>1437255<br>.1 | identical | 2085<br>9   | 20859       |
| GCF_004<br>054355.1 | ASM40<br>5435v1                                      | 125<br>4        | Pediococcus acidilactici (firmicutes)            | 1254       | Pediococcus acidilactici   | Contig   | PRJNA<br>514932 | 51493<br>2 | PRJNA<br>224116 | 22411<br>6 | SAMN1<br>0737798 | 10737<br>798 | strain | SRC<br>M<br>10328<br>9  | 393.<br>98 | Chunlab                                                                                       | na | full-genome-representation | GCA_0<br>0405435<br>5.1 | GCF_00<br>4054355<br>.1 | identical | 2022<br>494 | 20224<br>94 |
| GCF_009<br>809595.1 | ASM98<br>0959v1                                      | 125<br>5        | Pediococcus pentosaceus                          | 1255       | Pediococcus pentosaceus    | Contig   | PRJNA<br>576774 | 57677<br>4 | PRJNA<br>224116 | 22411<br>6 | SAMN1<br>3008348 | 13008<br>348 | strain | FAM<br>19132            | 124        | Agroscope                                                                                     | na | full-genome-representation | GCA_0<br>0980959<br>5.1 | GCF_00<br>9809595<br>.1 | identical | 1906<br>512 | 19065<br>12 |



|                     |                       |                 |                                               |             |                          |          |                 |            |                 |            |                       |              |        |              |     |                                         |    |                            |                         |                         |           |            |            |
|---------------------|-----------------------|-----------------|-----------------------------------------------|-------------|--------------------------|----------|-----------------|------------|-----------------|------------|-----------------------|--------------|--------|--------------|-----|-----------------------------------------|----|----------------------------|-------------------------|-------------------------|-----------|------------|------------|
|                     |                       |                 | (firmicutes)                                  |             |                          |          |                 |            |                 |            |                       |              |        |              |     |                                         |    | entation                   |                         |                         |           |            |            |
| GCF_005<br>864375.1 | ASM58<br>6437v1       | 125<br>4        | Pediococcus acidilactici (firmicutes)         | 1254        | Pediococcus acidilactici | Contig   | PRJNA<br>543085 | 54308<br>5 | PRJNA<br>224116 | 22411<br>6 | SAMN1<br>1653951      | 11653<br>951 | strain | FAM<br>18969 | 60  | Agroscope                               | na | full-genome-representation | GCA_0<br>0586437<br>5.1 | GCF_00<br>5864375<br>.1 | identical | 4139<br>25 | 41392<br>5 |
| GCF_900<br>163535.1 | ASM90<br>016353<br>v1 | 125<br>4        | Pediococcus acidilactici (firmicutes)         | 1254        | Pediococcus acidilactici | Contig   | PRJEB<br>19183  | 37443<br>1 | PRJNA<br>224116 | 22411<br>6 | SAMEA<br>8035316<br>8 | 63588<br>02  | strain | S7           | 448 | MICALIS                                 | na | full-genome-representation | GCA_9<br>0016353<br>5.1 | GCF_90<br>0163535<br>.1 | identical | 4058<br>83 | 40588<br>3 |
| GCF_001<br>436795.1 | ASM14<br>3679v1       | 125<br>4        | Pediococcus acidilactici (firmicutes)         | 1254        | Pediococcus acidilactici | Contig   | PRJNA<br>222257 | 22225<br>7 | PRJNA<br>224116 | 22411<br>6 | SAMN0<br>2797809      | 27978<br>09  | strain | AS1.2<br>696 | 100 | Shanghai<br>Majorbio                    | na | full-genome-representation | GCA_0<br>0143679<br>5.1 | GCF_00<br>1436795<br>.1 | identical | 4054<br>21 | 40542<br>1 |
| GCF_011<br>800215.1 | ASM11<br>80021v<br>1  | 168<br>369<br>7 | Pediococcus sp. EKM2 01D (firmicutes)         | 16836<br>97 | Pediococcus sp. EKM2 01D | Scaffold | PRJNA<br>605474 | 60547<br>4 | PRJNA<br>224116 | 22411<br>6 | SAMN1<br>4070316      | 14070<br>316 | strain | EKM<br>201D  | 227 | University<br>of Guelph                 | na | full-genome-representation | GCA_0<br>1180021<br>5.1 | GCF_01<br>1800215<br>.1 | identical | 4019<br>33 | 44095<br>9 |
| GCF_011<br>009615.1 | ASM11<br>00961v<br>1  | 125<br>5        | Pediococcus pentosaceus (firmicutes)          | 1255        | Pediococcus pentosaceus  | Contig   | PRJNA<br>517196 | 51719<br>6 | PRJNA<br>224116 | 22411<br>6 | SAMN1<br>0822534      | 10822<br>534 | strain | B4           | 15  | University<br>of Surrey                 | na | full-genome-representation | GCA_0<br>1100961<br>5.1 | GCF_01<br>1009615<br>.1 | identical | 3961<br>70 | 39617<br>0 |
| GCF_000<br>235805.1 | ASM23<br>580v2        | 108<br>036<br>5 | Pediococcus acidilactici MA18/5M (firmicutes) | 1254        | Pediococcus acidilactici | Contig   | PRJNA<br>72773  | 72773      | PRJNA<br>224116 | 22411<br>6 | SAMN0<br>2469945      | 24699<br>45  | strain | MA1<br>8/5M  | 33  | Institut<br>Rosell<br>Lallemand<br>Inc. | na | full-genome-representation | GCA_0<br>0023580<br>5.2 | GCF_00<br>0235805<br>.1 | identical | 3959<br>98 | 39599<br>8 |
| GCF_009<br>808645.1 | ASM98<br>0864v1       | 125<br>5        | Pediococcus pentosaceus (firmicutes)          | 1255        | Pediococcus pentosaceus  | Scaffold | PRJNA<br>576774 | 57677<br>4 | PRJNA<br>224116 | 22411<br>6 | SAMN1<br>3008395      | 13008<br>395 | strain | FAM<br>18321 | 15  | Agroscope                               | na | full-genome-representation | GCA_0<br>0980864<br>5.1 | GCF_00<br>9808645<br>.1 | identical | 3891<br>50 | 38915<br>0 |
| GCF_004<br>353295.1 | ASM43<br>5329v1       | 125<br>5        | Pediococcus pentosaceus (firmicutes)          | 1255        | Pediococcus pentosaceus  | Contig   | PRJNA<br>525615 | 52561<br>5 | PRJNA<br>224116 | 22411<br>6 | SAMN1<br>1054835      | 11054<br>835 | strain | MZF1<br>6    | 109 | University<br>of Rouen<br>Normandie     | na | full-genome-representation | GCA_0<br>0435329<br>5.1 | GCF_00<br>4353295<br>.1 | identical | 3643<br>01 | 36430<br>1 |

|                     |                  |          |                                             |      |                             |          |                 |            |                 |            |                  |              |        |                  |     |                               |    |                               |                         |                         |           |            |            |
|---------------------|------------------|----------|---------------------------------------------|------|-----------------------------|----------|-----------------|------------|-----------------|------------|------------------|--------------|--------|------------------|-----|-------------------------------|----|-------------------------------|-------------------------|-------------------------|-----------|------------|------------|
| GCF_009<br>809665.1 | ASM98<br>0966v1  | 125<br>5 | Pediococcus<br>pentosaceus<br>(firmicutes)  | 1255 | Pediococcus<br>pentosaceus  | Contig   | PRJNA<br>576774 | 57677<br>4 | PRJNA<br>224116 | 22411<br>6 | SAMN1<br>3008343 | 13008<br>343 | strain | FAM<br>13073     | 15  | Agroscope                     | na | full-genome<br>representation | GCA_0<br>0980966<br>5.1 | GCF_00<br>9809665<br>.1 | identical | 3353<br>13 | 33531<br>3 |
| GCF_002<br>553675.1 | ASM25<br>5367v1  | 125<br>4 | Pediococcus<br>acidilactici<br>(firmicutes) | 1254 | Pediococcus<br>acidilactici | Contig   | PRJNA<br>412075 | 41207<br>5 | PRJNA<br>224116 | 22411<br>6 | SAMN0<br>7702371 | 77023<br>71  | strain | UMN<br>PBX2<br>0 | 50  | University<br>of<br>Minnesota | na | full-genome<br>representation | GCA_0<br>0255367<br>5.1 | GCF_00<br>2553675<br>.1 | identical | 3267<br>28 | 32672<br>8 |
| GCF_005<br>864405.1 | ASM58<br>6440v1  | 125<br>5 | Pediococcus<br>pentosaceus<br>(firmicutes)  | 1255 | Pediococcus<br>pentosaceus  | Scaffold | PRJNA<br>543085 | 54308<br>5 | PRJNA<br>224116 | 22411<br>6 | SAMN1<br>1653952 | 11653<br>952 | strain | FAM<br>19144     | 23  | Agroscope                     | na | full-genome<br>representation | GCA_0<br>0586440<br>5.1 | GCF_00<br>5864405<br>.1 | identical | 3255<br>47 | 32554<br>7 |
| GCF_011<br>009695.1 | ASM11<br>00969v1 | 125<br>4 | Pediococcus<br>acidilactici<br>(firmicutes) | 1254 | Pediococcus<br>acidilactici | Contig   | PRJNA<br>517196 | 51719<br>6 | PRJNA<br>224116 | 22411<br>6 | SAMN1<br>0822530 | 10822<br>530 | strain | E24              | 15  | University<br>of Surrey       | na | full-genome<br>representation | GCA_0<br>1100969<br>5.1 | GCF_01<br>1009695<br>.1 | identical | 3188<br>66 | 31886<br>6 |
| GCF_011<br>009715.1 | ASM11<br>00971v1 | 125<br>4 | Pediococcus<br>acidilactici<br>(firmicutes) | 1254 | Pediococcus<br>acidilactici | Contig   | PRJNA<br>517196 | 51719<br>6 | PRJNA<br>224116 | 22411<br>6 | SAMN1<br>0822531 | 10822<br>531 | strain | F7               | 15  | University<br>of Surrey       | na | full-genome<br>representation | GCA_0<br>1100971<br>5.1 | GCF_01<br>1009715<br>.1 | identical | 3188<br>66 | 31886<br>6 |
| GCF_004<br>099675.1 | ASM40<br>9967v1  | 125<br>4 | Pediococcus<br>acidilactici<br>(firmicutes) | 1254 | Pediococcus<br>acidilactici | Scaffold | PRJNA<br>515210 | 51521<br>0 | PRJNA<br>224116 | 22411<br>6 | SAMN1<br>0744163 | 10744<br>163 | strain | L8-A             | 142 | Texas Tech<br>University      | na | full-genome<br>representation | GCA_0<br>0409967<br>5.1 | GCF_00<br>4099675<br>.1 | identical | 3154<br>44 | 31544<br>4 |
| GCF_004<br>099815.1 | ASM40<br>9981v1  | 125<br>4 | Pediococcus<br>acidilactici<br>(firmicutes) | 1254 | Pediococcus<br>acidilactici | Scaffold | PRJNA<br>515210 | 51521<br>0 | PRJNA<br>224116 | 22411<br>6 | SAMN1<br>0744156 | 10744<br>156 | strain | L2-A             | 214 | Texas Tech<br>University      | na | full-genome<br>representation | GCA_0<br>0409981<br>5.1 | GCF_00<br>4099815<br>.1 | identical | 3152<br>82 | 31528<br>2 |
| GCF_009<br>808085.1 | ASM98<br>0808v1  | 125<br>5 | Pediococcus<br>pentosaceus<br>(firmicutes)  | 1255 | Pediococcus<br>pentosaceus  | Contig   | PRJNA<br>576774 | 57677<br>4 | PRJNA<br>224116 | 22411<br>6 | SAMN1<br>3008308 | 13008<br>308 | strain | FAM<br>19169     | 17  | Agroscope                     | na | full-genome<br>representation | GCA_0<br>0980808<br>5.1 | GCF_00<br>9808085<br>.1 | identical | 3107<br>05 | 31070<br>5 |
| GCF_009<br>808845.1 | ASM98<br>0884v1  | 125<br>5 | Pediococcus<br>pentosaceus<br>(firmicutes)  | 1255 | Pediococcus<br>pentosaceus  | Scaffold | PRJNA<br>576774 | 57677<br>4 | PRJNA<br>224116 | 22411<br>6 | SAMN1<br>3008385 | 13008<br>385 | strain | FAM<br>18813     | 16  | Agroscope                     | na | full-genome<br>representation | GCA_0<br>0980884<br>5.1 | GCF_00<br>9808845<br>.1 | identical | 3087<br>15 | 30871<br>5 |

|                     |                  |                 |                                                |             |                                |          |                 |            |                 |            |                  |              |                          |     |                                                                                              |    |                                                   |                         |                         |                |            |            |
|---------------------|------------------|-----------------|------------------------------------------------|-------------|--------------------------------|----------|-----------------|------------|-----------------|------------|------------------|--------------|--------------------------|-----|----------------------------------------------------------------------------------------------|----|---------------------------------------------------|-------------------------|-------------------------|----------------|------------|------------|
| GCF_009<br>910835.1 | ASM99<br>1083v1  | 125<br>4        | Pediococcus<br>acidilactici<br>(firmicutes)    | 1254        | Pediococcus<br>acidilactici    | Contig   | PRJNA<br>544274 | 54427<br>4 | PRJNA<br>224116 | 22411<br>6 | SAMN1<br>1831832 | 11831<br>832 | strain<br>E1             | 20  | University<br>of Surrey                                                                      | na | full-<br>geno-<br>me-<br>repres-<br>entati-<br>on | GCA_0<br>0991083<br>5.1 | GCF_00<br>9910835<br>.1 | iden-<br>tical | 2984<br>07 | 29840<br>7 |
| GCF_011<br>009675.1 | ASM11<br>00967v1 | 125<br>4        | Pediococcus<br>acidilactici<br>(firmicutes)    | 1254        | Pediococcus<br>acidilactici    | Contig   | PRJNA<br>517196 | 51719<br>6 | PRJNA<br>224116 | 22411<br>6 | SAMN1<br>0822532 | 10822<br>532 | strain<br>I32            | 15  | University<br>of Surrey                                                                      | na | full-<br>geno-<br>me-<br>repres-<br>entati-<br>on | GCA_0<br>1100967<br>5.1 | GCF_01<br>1009675<br>.1 | iden-<br>tical | 2984<br>07 | 29840<br>7 |
| GCF_009<br>808815.1 | ASM98<br>0881v1  | 125<br>5        | Pediococcus<br>pentosaceus<br>(firmicutes)     | 1255        | Pediococcus<br>pentosaceus     | Scaffold | PRJNA<br>576774 | 57677<br>4 | PRJNA<br>224116 | 22411<br>6 | SAMN1<br>3008387 | 13008<br>387 | strain<br>FAM20650       | 34  | Agroscope                                                                                    | na | full-<br>geno-<br>me-<br>repres-<br>entati-<br>on | GCA_0<br>0980881<br>5.1 | GCF_00<br>9808815<br>.1 | iden-<br>tical | 2972<br>52 | 29725<br>2 |
| GCF_007<br>992275.1 | ASM79<br>9227v1  | 125<br>5        | Pediococcus<br>pentosaceus<br>(firmicutes)     | 1255        | Pediococcus<br>pentosaceus     | Contig   | PRJDB<br>6300   | 40072<br>3 | PRJNA<br>224116 | 22411<br>6 | SAMD0<br>0172662 | 11843<br>515 | strain<br>NBR<br>C107768 | 141 | National<br>Institute of<br>Technology and<br>Evaluation<br>Biological<br>Resource<br>Center | na | full-<br>geno-<br>me-<br>repres-<br>entati-<br>on | GCA_0<br>0799227<br>5.1 | GCF_00<br>7992275<br>.1 | iden-<br>tical | 2957<br>78 | 29577<br>8 |
| GCF_013<br>385165.1 | ASM13<br>38516v1 | 125<br>5        | Pediococcus<br>pentosaceus<br>(firmicutes)     | 1255        | Pediococcus<br>pentosaceus     | Contig   | PRJNA<br>641973 | 64197<br>3 | PRJNA<br>224116 | 22411<br>6 | SAMN1<br>5374531 | 15374<br>531 | strain<br>TUC<br>O-3     | 476 | CERELA                                                                                       | na | full-<br>geno-<br>me-<br>repres-<br>entati-<br>on | GCA_0<br>1338516<br>5.1 | GCF_01<br>3385165<br>.1 | iden-<br>tical | 2952<br>12 | 29521<br>2 |
| GCF_002<br>724015.1 | ASM27<br>2401v1  | 125<br>5        | Pediococcus<br>pentosaceus<br>(firmicutes)     | 1255        | Pediococcus<br>pentosaceus     | Contig   | PRJDB<br>6040   | 39635<br>0 | PRJNA<br>224116 | 22411<br>6 | SAMD0<br>0093675 | 77685<br>43  | strain<br>NBR<br>C3182   | 107 | National<br>Institute of<br>Technology and<br>Evaluation<br>Biological<br>Resource<br>Center | na | full-<br>geno-<br>me-<br>repres-<br>entati-<br>on | GCA_0<br>0272401<br>5.1 | GCF_00<br>2724015<br>.1 | iden-<br>tical | 2917<br>56 | 29175<br>6 |
| GCF_011<br>800255.1 | ASM11<br>80025v1 | 168<br>369<br>8 | Pediococcus<br>sp. EKM2<br>02D<br>(firmicutes) | 16836<br>98 | Pediococcus<br>sp. EKM2<br>02D | Scaffold | PRJNA<br>605474 | 60547<br>4 | PRJNA<br>224116 | 22411<br>6 | SAMN1<br>4070325 | 14070<br>325 | strain<br>EKM<br>202D    | 235 | University<br>of Guelph                                                                      | na | full-<br>geno-<br>me-<br>repres-<br>entati-<br>on | GCA_0<br>1180025<br>5.1 | GCF_01<br>1800255<br>.1 | iden-<br>tical | 2873<br>48 | 44028<br>7 |
| GCF_013<br>249135.1 | ASM13<br>24913v1 | 125<br>4        | Pediococcus<br>acidilactici<br>(firmicutes)    | 1254        | Pediococcus<br>acidilactici    | Contig   | PRJNA<br>574342 | 57434<br>2 | PRJNA<br>224116 | 22411<br>6 | SAMN1<br>4848240 | 14848<br>240 | strain<br>BIO6<br>314    | 876 | Bioprox                                                                                      | na | full-<br>geno-<br>me-<br>repres-<br>entati-<br>on | GCA_0<br>1324913<br>5.1 | GCF_01<br>3249135<br>.1 | iden-<br>tical | 2700<br>87 | 27008<br>7 |

|                     |                 |                 |                                                                |            |                                     |              |                 |            |                 |            |                  |              |            |                        |     |                                                                                                  |    |                                                |                         |                         |               |            |             |
|---------------------|-----------------|-----------------|----------------------------------------------------------------|------------|-------------------------------------|--------------|-----------------|------------|-----------------|------------|------------------|--------------|------------|------------------------|-----|--------------------------------------------------------------------------------------------------|----|------------------------------------------------|-------------------------|-------------------------|---------------|------------|-------------|
| GCF_013<br>375165.1 | Unicyc<br>ler   | 125<br>4        | Pedioc<br>occus<br>acidila<br>ctici<br>(firmic<br>utes)        | 1254       | Pedioc<br>occus<br>acidila<br>ctici | Scaffol<br>d | PRJNA<br>640898 | 64089<br>8 | PRJNA<br>224116 | 22411<br>6 | SAMN1<br>5337232 | 15337<br>232 | strai<br>n | IRZ12<br>B             | 258 | Padova<br>university                                                                             | na | full-<br>geno<br>me-<br>repres<br>entati<br>on | GCA_0<br>1337516<br>5.1 | GCF_01<br>3375165<br>.1 | iden<br>tical | 2598<br>48 | 20246<br>45 |
| GCF_004<br>115445.1 | ASM41<br>1544v1 | 125<br>5        | Pedioc<br>occus<br>pentos<br>aceus<br>(firmic<br>utes)         | 1255       | Pedioc<br>occus<br>pentos<br>aceus  | Scaffol<br>d | PRJNA<br>513828 | 51382<br>8 | PRJNA<br>224116 | 22411<br>6 | SAMN1<br>0721079 | 10721<br>079 | strai<br>n | 6_1                    | 521 | Beijing<br>Technology<br>and<br>Business<br>University                                           | na | full-<br>geno<br>me-<br>repres<br>entati<br>on | GCA_0<br>0411544<br>5.1 | GCF_00<br>4115445<br>.1 | iden<br>tical | 2450<br>36 | 24503<br>6  |
| GCF_001<br>672605.1 | ASM16<br>7260v1 | 125<br>4        | Pedioc<br>occus<br>acidila<br>ctici<br>(firmic<br>utes)        | 1254       | Pedioc<br>occus<br>acidila<br>ctici | Contig       | PRJNA<br>321943 | 32194<br>3 | PRJNA<br>224116 | 22411<br>6 | SAMN0<br>5162513 | 51625<br>13  | strai<br>n | SRC<br>M100<br>320     | 758 | Microbial<br>Institue for<br>Fermentati<br>on<br>Industry                                        | na | full-<br>geno<br>me-<br>repres<br>entati<br>on | GCA_0<br>0167260<br>5.1 | GCF_00<br>1672605<br>.1 | iden<br>tical | 2306<br>91 | 23069<br>1  |
| GCF_000<br>380265.1 | PAD3_<br>1.0    | 130<br>695<br>2 | Pedioc<br>occus<br>acidila<br>ctici<br>D3<br>(firmic<br>utes)  | 1254       | Pedioc<br>occus<br>acidila<br>ctici | Scaffol<br>d | PRJNA<br>193440 | 19344<br>0 | PRJNA<br>224116 | 22411<br>6 | SAMN0<br>1991044 | 19910<br>44  | strai<br>n | D3                     | 567 | Texas<br>A&M<br>University                                                                       | na | full-<br>geno<br>me-<br>repres<br>entati<br>on | GCA_0<br>0038026<br>5.1 | GCF_00<br>0380265<br>.1 | iden<br>tical | 2243<br>42 | 18658<br>05 |
| GCF_006<br>539025.1 | ASM65<br>3902v1 | 125<br>4        | Pedioc<br>occus<br>acidila<br>ctici<br>(firmic<br>utes)        | 1254       | Pedioc<br>occus<br>acidila<br>ctici | Contig       | PRJDB<br>6046   | 39635<br>6 | PRJNA<br>224116 | 22411<br>6 | SAMD0<br>0097159 | 12056<br>569 | strai<br>n | NBR<br>C<br>12231      | 298 | National<br>Institute of<br>Technolog<br>y and<br>Evaluation<br>Biological<br>Resource<br>Center | na | full-<br>geno<br>me-<br>repres<br>entati<br>on | GCA_0<br>0653902<br>5.1 | GCF_00<br>6539025<br>.1 | iden<br>tical | 2123<br>97 | 21239<br>7  |
| GCF_000<br>163095.1 | ASM16<br>309v1  | 563<br>194      | Pedioc<br>occus<br>acidila<br>ctici<br>7_4<br>(firmic<br>utes) | 1254       | Pedioc<br>occus<br>acidila<br>ctici | Scaffol<br>d | PRJNA<br>40051  | 40051      | PRJNA<br>224116 | 22411<br>6 | SAMN0<br>2463809 | 24638<br>09  | strai<br>n | 7_4                    | 0   | Broad<br>Institute                                                                               | na | full-<br>geno<br>me-<br>repres<br>entati<br>on | GCA_0<br>0016309<br>5.1 | GCF_00<br>0163095<br>.1 | iden<br>tical | 1742<br>86 | 38405<br>5  |
| GCF_007<br>989045.1 | ASM79<br>8904v1 | 319<br>652      | Pedioc<br>occus<br>cellicol<br>a<br>(firmic<br>utes)           | 31965<br>2 | Pedioc<br>occus<br>cellicol<br>a    | Contig       | PRJDB<br>6231   | 39965<br>7 | PRJNA<br>224116 | 22411<br>6 | SAMD0<br>0166038 | 11282<br>932 | strai<br>n | NBR<br>C<br>10610<br>3 | 289 | National<br>Institute of<br>Technolog<br>y and<br>Evaluation<br>Biological<br>Resource<br>Center | na | full-<br>geno<br>me-<br>repres<br>entati<br>on | GCA_0<br>0798904<br>5.1 | GCF_00<br>7989045<br>.1 | iden<br>tical | 1609<br>00 | 16090<br>0  |
| GCF_003<br>571945.1 | ASM35<br>7194v1 | 125<br>4        | Pedioc<br>occus<br>acidila<br>ctici<br>(firmic<br>utes)        | 1254       | Pedioc<br>occus<br>acidila<br>ctici | Contig       | PRJNA<br>478800 | 47880<br>0 | PRJNA<br>224116 | 22411<br>6 | SAMN0<br>9531784 | 95317<br>84  | strai<br>n | GS1                    | 120 | Kangwon<br>Natl. Univ.                                                                           | na | full-<br>geno<br>me-<br>repres<br>entati<br>on | GCA_0<br>0357194<br>5.1 | GCF_00<br>3571945<br>.1 | iden<br>tical | 1578<br>35 | 15783<br>5  |

|                     |                 |                 |                                                    |            |                             |          |                 |            |                 |            |                  |              |                    |     |                                                |    |                                                 |                         |                         |               |            |            |
|---------------------|-----------------|-----------------|----------------------------------------------------|------------|-----------------------------|----------|-----------------|------------|-----------------|------------|------------------|--------------|--------------------|-----|------------------------------------------------|----|-------------------------------------------------|-------------------------|-------------------------|---------------|------------|------------|
| GCF_004<br>100005.1 | ASM41<br>0000v1 | 125<br>4        | Pediococcus<br>acidilactici<br>(firmicutes)        | 1254       | Pediococcus<br>acidilactici | Scaffold | PRJNA<br>515210 | 51521<br>0 | PRJNA<br>224116 | 22411<br>6 | SAMN1<br>0744148 | 10744<br>148 | strain<br>L14-B    | 67  | Texas Tech<br>University                       | na | full-<br>geno-<br>me-<br>repres<br>entati<br>on | GCA_0<br>0410000<br>5.1 | GCF_00<br>4100005<br>.1 | iden<br>tical | 1495<br>55 | 14955<br>5 |
| GCF_009<br>809195.1 | ASM98<br>0919v1 | 125<br>5        | Pediococcus<br>pentosaceus<br>(firmicutes)         | 1255       | Pediococcus<br>pentosaceus  | Contig   | PRJNA<br>576774 | 57677<br>4 | PRJNA<br>224116 | 22411<br>6 | SAMN1<br>3008369 | 13008<br>369 | strain<br>FAM17622 | 18  | Agroscope                                      | na | full-<br>geno-<br>me-<br>repres<br>entati<br>on | GCA_0<br>0980919<br>5.1 | GCF_00<br>9809195<br>.1 | iden<br>tical | 1310<br>18 | 13101<br>8 |
| GCF_003<br>591195.1 | ASM35<br>9119v1 | 125<br>4        | Pediococcus<br>acidilactici<br>(firmicutes)        | 1254       | Pediococcus<br>acidilactici | Contig   | PRJNA<br>479750 | 47975<br>0 | PRJNA<br>224116 | 22411<br>6 | SAMN0<br>9604260 | 96042<br>60  | strain<br>WT       | 160 | Kangwon<br>Nat'l. Univ.                        | na | full-<br>geno-<br>me-<br>repres<br>entati<br>on | GCA_0<br>0359119<br>5.1 | GCF_00<br>3591195<br>.1 | iden<br>tical | 1298<br>26 | 12982<br>6 |
| GCF_005<br>864415.1 | ASM58<br>6441v1 | 331<br>679      | Pediococcus<br>stilesii<br>(firmicutes)            | 33167<br>9 | Pediococcus<br>stilesii     | Scaffold | PRJNA<br>543085 | 54308<br>5 | PRJNA<br>224116 | 22411<br>6 | SAMN1<br>1653953 | 11653<br>953 | strain<br>FAM18815 | 13  | Agroscope                                      | na | full-<br>geno-<br>me-<br>repres<br>entati<br>on | GCA_0<br>0586441<br>5.1 | GCF_00<br>5864415<br>.1 | iden<br>tical | 1204<br>03 | 12040<br>3 |
| GCF_001<br>593095.1 | ASM15<br>9309v1 | 125<br>5        | Pediococcus<br>pentosaceus<br>(firmicutes)         | 1255       | Pediococcus<br>pentosaceus  | Contig   | PRJNA<br>310676 | 31067<br>6 | PRJNA<br>224116 | 22411<br>6 | SAMN0<br>4453291 | 44532<br>91  | strain<br>FBL2     | 522 | Kyunghee<br>University                         | na | full-<br>geno-<br>me-<br>repres<br>entati<br>on | GCA_0<br>0159309<br>5.1 | GCF_00<br>1593095<br>.1 | iden<br>tical | 1170<br>20 | 11702<br>0 |
| GCF_000<br>285875.1 | ASM28<br>587v1  | 113<br>359<br>6 | Pediococcus<br>pentosaceus<br>IE-3<br>(firmicutes) | 1255       | Pediococcus<br>pentosaceus  | Contig   | PRJEA<br>80991  | 80991      | PRJNA<br>224116 | 22411<br>6 | SAMEA<br>2272526 | 24841<br>74  | strain<br>IE-3     | 0   | Institute of<br>Microbial<br>Technology (CSIR) | na | full-<br>geno-<br>me-<br>repres<br>entati<br>on | GCA_0<br>0028587<br>5.1 | GCF_00<br>0285875<br>.1 | iden<br>tical | 1152<br>49 | 11524<br>9 |
| GCF_009<br>809485.1 | ASM98<br>0948v1 | 125<br>5        | Pediococcus<br>pentosaceus<br>(firmicutes)         | 1255       | Pediococcus<br>pentosaceus  | Contig   | PRJNA<br>576774 | 57677<br>4 | PRJNA<br>224116 | 22411<br>6 | SAMN1<br>3008353 | 13008<br>353 | strain<br>FAM19083 | 27  | Agroscope                                      | na | full-<br>geno-<br>me-<br>repres<br>entati<br>on | GCA_0<br>0980948<br>5.1 | GCF_00<br>9809485<br>.1 | iden<br>tical | 1025<br>21 | 10252<br>1 |
| GCF_009<br>809425.1 | ASM98<br>0942v1 | 125<br>5        | Pediococcus<br>pentosaceus<br>(firmicutes)         | 1255       | Pediococcus<br>pentosaceus  | Contig   | PRJNA<br>576774 | 57677<br>4 | PRJNA<br>224116 | 22411<br>6 | SAMN1<br>3008356 | 13008<br>356 | strain<br>FAM19080 | 21  | Agroscope                                      | na | full-<br>geno-<br>me-<br>repres<br>entati<br>on | GCA_0<br>0980942<br>5.1 | GCF_00<br>9809425<br>.1 | iden<br>tical | 9377<br>5  | 93775      |
| GCF_009<br>809875.1 | ASM98<br>0987v1 | 125<br>5        | Pediococcus<br>pentosaceus                         | 1255       | Pediococcus<br>pentosaceus  | Scaffold | PRJNA<br>576774 | 57677<br>4 | PRJNA<br>224116 | 22411<br>6 | SAMN1<br>3008333 | 13008<br>333 | strain<br>FAM19086 | 15  | Agroscope                                      | na | full-<br>geno-<br>me-<br>repres                 | GCA_0<br>0980987<br>5.1 | GCF_00<br>9809875<br>.1 | iden<br>tical | 9165<br>7  | 91657      |

| (firmicutes)        |                 |            |                                             |            |                               |          |                 |            |                 |            |                  |              |                                  |     |                                                                                                                                              | entation |                                |                         |                         |           |           |             |
|---------------------|-----------------|------------|---------------------------------------------|------------|-------------------------------|----------|-----------------|------------|-----------------|------------|------------------|--------------|----------------------------------|-----|----------------------------------------------------------------------------------------------------------------------------------------------|----------|--------------------------------|-------------------------|-------------------------|-----------|-----------|-------------|
| GCF_001<br>748065.1 | ASM17<br>4806v1 | 125<br>5   | Pediococcus<br>pentosaceus<br>(firmicutes)  | 1255       | Pediococcus<br>pentosaceus    | Scaffold | PRJDB<br>4140   | 33843<br>6 | PRJNA<br>224116 | 22411<br>6 | SAMD0<br>0036446 | 55542<br>34  | strain<br>LP28                   | 155 | Department of<br>Molecular Biology<br>and Biotechnology,<br>Graduate School of<br>Biomedical and<br>Health Sciences,<br>Hiroshima University | na       | full-genome-<br>representation | GCA_0<br>0174806<br>5.1 | GCF_00<br>1748065<br>.1 | identical | 8713<br>9 | 17748<br>65 |
| GCF_001<br>634455.1 | ASM16<br>3445v1 | 125<br>4   | Pediococcus<br>acidilactici<br>(firmicutes) | 1254       | Pediococcus<br>acidilactici   | Contig   | PRJNA<br>308163 | 30816<br>3 | PRJNA<br>224116 | 22411<br>6 | SAMN0<br>4387728 | 43877<br>28  | strain<br>NRC<br>C1              | 197 | ICAR-National<br>Research Centre on<br>Camel                                                                                                 | na       | full-genome-<br>representation | GCA_0<br>0163445<br>5.1 | GCF_00<br>1634455<br>.1 | identical | 7821<br>3 | 78213       |
| GCF_001<br>541865.1 | ASM15<br>4186v1 | 125<br>5   | Pediococcus<br>pentosaceus<br>(firmicutes)  | 1255       | Pediococcus<br>pentosaceus    | Contig   | PRJNA<br>308373 | 30837<br>3 | PRJNA<br>224116 | 22411<br>6 | SAMN0<br>4395033 | 43950<br>33  | strain<br>NKY<br>L15             | 100 | Institute of<br>Subtropical<br>Agriculture, Chinese<br>Academy of Sciences                                                                   | na       | full-genome-<br>representation | GCA_0<br>0154186<br>5.1 | GCF_00<br>1541865<br>.1 | identical | 7591<br>6 | 75916       |
| GCF_002<br>770665.1 | ASM27<br>7066v1 | 516<br>63  | Pediococcus<br>damnosus<br>(firmicutes)     | 51663      | Pediococcus<br>damnosus       | Scaffold | PRJNA<br>354877 | 35487<br>7 | PRJNA<br>224116 | 22411<br>6 | SAMN0<br>6053758 | 60537<br>58  | strain<br>VTT<br>E-12321<br>2    | 50  | University of<br>Saskatchewan                                                                                                                | na       | full-genome-<br>representation | GCA_0<br>0277066<br>5.1 | GCF_00<br>2770665<br>.1 | identical | 7406<br>7 | 20247<br>86 |
| GCF_001<br>641385.1 | ASM16<br>4138v1 | 114<br>090 | Pediococcus<br>inopinatus<br>(firmicutes)   | 11409<br>0 | Pediococcus<br>inopinatus     | Contig   | PRJDB<br>2940   | 31744<br>4 | PRJNA<br>224116 | 22411<br>6 | SAMD0<br>0018420 | 46068<br>22  | strain<br>Wikim15                | 552 | World Institute of<br>Kimchi                                                                                                                 | na       | full-genome-<br>representation | GCA_0<br>0164138<br>5.1 | GCF_00<br>1641385<br>.1 | identical | 6982<br>8 | 69828       |
| GCF_001<br>638245.1 | ASM16<br>3824v1 | 125<br>4   | Pediococcus<br>acidilactici<br>(firmicutes) | 1254       | Pediococcus<br>acidilactici   | Contig   | PRJNA<br>309020 | 30902<br>0 | PRJNA<br>224116 | 22411<br>6 | SAMN0<br>4419358 | 44193<br>58  | strain<br>NRC<br>C3              | 20  | ICAR-National<br>Research Centre on<br>Camel                                                                                                 | na       | full-genome-<br>representation | GCA_0<br>0163824<br>5.1 | GCF_00<br>1638245<br>.1 | identical | 5855<br>3 | 58553       |
| GCF_007<br>991575.1 | ASM79<br>9157v1 | 319<br>653 | Pediococcus<br>ethanolidurans               | 31965<br>3 | Pediococcus<br>ethanolidurans | Contig   | PRJDB<br>6232   | 39965<br>8 | PRJNA<br>224116 | 22411<br>6 | SAMD0<br>0170759 | 11603<br>097 | strain<br>NBR<br>C<br>10610<br>4 | 108 | National Institute of<br>Technology and<br>Evaluation                                                                                        | na       | full-genome-<br>representation | GCA_0<br>0799157<br>5.1 | GCF_00<br>7991575<br>.1 | identical | 5691<br>3 | 56913       |

|                     |                 |            |                                             |        |                          |          |                 |            |                 |            |                  |              |                            |          |                                                                                  |          |                            |                     |                     |           |           |             |
|---------------------|-----------------|------------|---------------------------------------------|--------|--------------------------|----------|-----------------|------------|-----------------|------------|------------------|--------------|----------------------------|----------|----------------------------------------------------------------------------------|----------|----------------------------|---------------------|---------------------|-----------|-----------|-------------|
| (firmicutes)        |                 |            |                                             |        |                          |          |                 |            |                 |            |                  |              |                            |          | Biological Resource Center                                                       | entation |                            |                     |                     |           |           |             |
| GCF_001<br>461015.1 | ASM14<br>6101v1 | 125<br>4   | Pediococcus acidilactici (firmicutes)       | 1254   | Pediococcus acidilactici | Contig   | PRJNA<br>296933 | 29693<br>3 | PRJNA<br>224116 | 22411<br>6 | SAMN0<br>4111307 | 41113<br>07  | strain<br>S1               | 531      | Shin's Lab., Kyungpook National University                                       | na       | full-genome-representation | GCA_00146101<br>5.1 | GCF_001461015<br>.1 | identical | 5571<br>7 | 55717       |
| GCF_001<br>640785.1 | ASM16<br>4078v1 | 540<br>62  | Pediococcus parvulus (firmicutes)           | 54062  | Pediococcus parvulus     | Contig   | PRJNA<br>320830 | 32083<br>0 | PRJNA<br>224116 | 22411<br>6 | SAMN0<br>4958102 | 49581<br>02  | strain<br>2.6              | 100<br>0 | Consiglio per la ricerca in agricoltura e l'analisi dell'economia agraria (CREA) | na       | full-genome-representation | GCA_00164078<br>5.1 | GCF_001640785<br>.1 | identical | 5111<br>5 | 51115       |
| GCF_002<br>770635.1 | ASM27<br>7063v1 | 516<br>63  | Pediococcus damnosus (firmicutes)           | 51663  | Pediococcus damnosus     | Scaffold | PRJNA<br>354877 | 35487<br>7 | PRJNA<br>224116 | 22411<br>6 | SAMN0<br>6053759 | 60537<br>59  | strain<br>VTT E-12321<br>6 | 50       | University of Saskatchewan                                                       | na       | full-genome-representation | GCA_00277063<br>5.1 | GCF_002770635<br>.1 | identical | 4362<br>0 | 20868<br>33 |
| GCF_002<br>787675.1 | ASM27<br>8767v1 | 516<br>63  | Pediococcus damnosus (firmicutes)           | 51663  | Pediococcus damnosus     | Scaffold | PRJNA<br>354877 | 35487<br>7 | PRJNA<br>224116 | 22411<br>6 | SAMN0<br>6053757 | 60537<br>57  | strain<br>P58              | 30       | University of Saskatchewan                                                       | na       | full-genome-representation | GCA_00278767<br>5.1 | GCF_002787675<br>.1 | identical | 4338<br>7 | 20879<br>95 |
| GCF_007<br>992295.1 | ASM79<br>9229v1 | 480<br>391 | Pediococcus argentinus (firmicutes)         | 480391 | Pediococcus argentinus   | Contig   | PRJDB<br>6301   | 40072<br>4 | PRJNA<br>224116 | 22411<br>6 | SAMD0<br>0172663 | 11843<br>516 | strain<br>NBR C 10782<br>7 | 137      | National Institute of Technology and Evaluation Biological Resource Center       | na       | full-genome-representation | GCA_00799229<br>5.1 | GCF_007992295<br>.1 | identical | 4208<br>9 | 42089       |
| GCF_001<br>634445.1 | ASM16<br>3444v1 | 125<br>4   | Pediococcus acidilactici (firmicutes)       | 1254   | Pediococcus acidilactici | Contig   | PRJNA<br>308165 | 30816<br>5 | PRJNA<br>224116 | 22411<br>6 | SAMN0<br>4387731 | 43877<br>31  | strain<br>NRC C2           | 53.4     | ICAR-National Research Centre on Camel                                           | na       | full-genome-representation | GCA_00163444<br>5.1 | GCF_001634445<br>.1 | identical | 2685<br>7 | 26857       |
| GCF_000<br>962875.1 | ASM96<br>287v1  | 814<br>3   | Pediococcus damnosus LMG 28219 (firmicutes) | 51663  | Pediococcus damnosus     | Contig   | PRJNA<br>234374 | 23437<br>4 | PRJNA<br>224116 | 22411<br>6 | SAMN0<br>2592738 | 25927<br>38  | strain<br>LMG 28219        | 270      | Ghent University                                                                 | na       | full-genome-representation | GCA_00096287<br>5.1 | GCF_000962875<br>.1 | identical | 2465<br>9 | 24659       |

|                     |                  |           |                                             |       |                             |          |                 |            |                 |            |                  |              |        |                    |     |                                                                                              |    |                                                 |                         |                         |               |             |             |
|---------------------|------------------|-----------|---------------------------------------------|-------|-----------------------------|----------|-----------------|------------|-----------------|------------|------------------|--------------|--------|--------------------|-----|----------------------------------------------------------------------------------------------|----|-------------------------------------------------|-------------------------|-------------------------|---------------|-------------|-------------|
| GCF_006<br>538785.1 | ASM65<br>3878v1  | 516<br>63 | Pediococcus<br>damnosus<br>(firmicutes)     | 51663 | Pediococcus<br>damnosus     | Contig   | PRJDB<br>6044   | 39635<br>4 | PRJNA<br>224116 | 22411<br>6 | SAMD0<br>0093694 | 12056<br>557 | strain | NBR<br>C<br>3889   | 91  | National<br>Institute of<br>Technology and<br>Evaluation<br>Biological<br>Resource<br>Center | na | full-<br>geno-<br>me-<br>repres<br>entati<br>on | GCA_0<br>0653878<br>5.1 | GCF_00<br>6538785<br>.1 | iden<br>tical | 2034<br>8   | 20348       |
| GCF_004<br>022295.1 | ASM40<br>2229v1  | 125<br>4  | Pediococcus<br>acidilactici<br>(firmicutes) | 1254  | Pediococcus<br>acidilactici | Scaffold | PRJNA<br>512885 | 51288<br>5 | PRJNA<br>224116 | 22411<br>6 | SAMN1<br>0690227 | 10690<br>227 | strain | LPBC<br>161        | 11  | UFPR                                                                                         | na | full-<br>geno-<br>me-<br>repres<br>entati<br>on | GCA_0<br>0402229<br>5.1 | GCF_00<br>4022295<br>.1 | iden<br>tical | 1814<br>0   | 19488       |
| GCF_011<br>009585.1 | ASM11<br>00958v1 | 125<br>4  | Pediococcus<br>acidilactici<br>(firmicutes) | 1254  | Pediococcus<br>acidilactici | Contig   | PRJNA<br>517196 | 51719<br>6 | PRJNA<br>224116 | 22411<br>6 | SAMN1<br>0822533 | 10822<br>533 | strain | M16                | 5   | University<br>of Surrey                                                                      | na | full-<br>geno-<br>me-<br>repres<br>entati<br>on | GCA_0<br>1100958<br>5.1 | GCF_01<br>1009585<br>.1 | iden<br>tical | 1131<br>7   | 11317       |
| GCF_001<br>636135.1 | ASM16<br>3613v1  | 516<br>63 | Pediococcus<br>damnosus<br>(firmicutes)     | 51663 | Pediococcus<br>damnosus     | Scaffold | PRJNA<br>309620 | 30962<br>0 | PRJNA<br>224116 | 22411<br>6 | SAMN0<br>4437152 | 44371<br>52  | strain | BM-<br>PD14<br>610 | 400 | South<br>China<br>University<br>of Technolog<br>y                                            | na | full-<br>geno-<br>me-<br>repres<br>entati<br>on | GCA_0<br>0163613<br>5.1 | GCF_00<br>1636135<br>.1 | iden<br>tical | 8404        | 12875       |
| GCF_001<br>868705.1 | ASM18<br>6870v1  | 125<br>4  | Pediococcus<br>acidilactici<br>(firmicutes) | 1254  | Pediococcus<br>acidilactici | Contig   | PRJNA<br>344012 | 34401<br>2 | PRJNA<br>224116 | 22411<br>6 | SAMN0<br>5804765 | 58047<br>65  | strain | JKY1<br>8          | 788 | Anhui<br>University                                                                          | na | exclud<br>ed-<br>from-<br>refseq                | GCA_0<br>0186870<br>5.1 | GCF_00<br>1868705<br>.1 | iden<br>tical | 1643<br>836 | 16438<br>36 |
| GCA_00<br>9761085.1 | ASM97<br>6108v1  | 125<br>4  | Pediococcus<br>acidilactici<br>(firmicutes) | 1254  | Pediococcus<br>acidilactici | Contig   | PRJNA<br>434783 | 43478<br>3 |                 |            | SAMN0<br>8574375 | 85743<br>75  | strain | NCD<br>C 252       | 30  | KURUKS<br>HETRA<br>UNIVERSITY<br>KURUKS<br>HETRA                                             | na | exclud<br>ed-<br>from-<br>refseq                | GCA_0<br>0976108<br>5.1 |                         |               | 3588<br>21  | 35882<br>1  |
| GCF_001<br>294765.1 | PedAci<br>K3     | 125<br>4  | Pediococcus<br>acidilactici<br>(firmicutes) | 1254  | Pediococcus<br>acidilactici | Contig   | PRJNA<br>293918 | 29391<br>8 | PRJNA<br>224116 | 22411<br>6 | SAMN0<br>4011952 | 40119<br>52  | strain | K3                 | 385 | Shin's<br>Lab.,<br>Kyungpook<br>National<br>University                                       | na | exclud<br>ed-<br>from-<br>refseq                | GCA_0<br>0129476<br>5.1 | GCF_00<br>1294765<br>.1 | iden<br>tical | 7887<br>0   | 78870       |
| GCF_001<br>867265.1 | ASM18<br>6726v1  | 125<br>4  | Pediococcus<br>acidilactici<br>(firmicutes) | 1254  | Pediococcus<br>acidilactici | Contig   | PRJNA<br>336459 | 33645<br>9 | PRJNA<br>224116 | 22411<br>6 | SAMN0<br>5510866 | 55108<br>66  | strain | NRC<br>C4          | 12  | ICAR-<br>National<br>Research<br>Centre on<br>Camel                                          | na | exclud<br>ed-<br>from-<br>refseq                | GCA_0<br>0186726<br>5.1 | GCF_00<br>1867265<br>.1 | iden<br>tical | 9323        | 9323        |
